# Supplementary material for: High-throughput roll-to-roll production of polymer biochips for multiplexed DNA detection in point-of-care diagnostics
Source: Royal Society of Chemistry journal article supplement (doi:10.1039/d0lc00751j), 2020-01-01
Supplement: d0lc00751j1.pdf [file d0lc00751j1.pdf]

## Supplementary Information

For

### High-Throughput Roll-to-Roll Production of Polymer Biochips for Multiplexed Point-of-Care Diagnostics

Pelin Toren,<sup>a,\*</sup> Martin Smolka,<sup>a</sup> Anja Haase,<sup>a</sup> Ursula Palfinger,<sup>a</sup> Dieter Nees,<sup>a</sup> Stephan Ruttloff,<sup>a</sup> Ladislav Kuna,<sup>a</sup> Cindy Schaude,<sup>a</sup> Sandra Jauk,<sup>a</sup> Markus Rumpler,<sup>b</sup> Bettina Hierschlager,<sup>c</sup> Ingo Katzmayer,<sup>c</sup> Max Sonnleitner,<sup>c</sup> Manuel W. Thesen,<sup>d</sup> Mirko Lohse,<sup>d</sup> Martin Horn,<sup>e</sup> Wilfried Weigel,<sup>e</sup> Matija Strbac,<sup>f</sup> Goran Bijelic,<sup>f</sup> Suhith Hemanth,<sup>g</sup> Nastasia Okulova,<sup>g</sup> Jan Kafka,<sup>g</sup> Stefan Kostler,<sup>a,#</sup> Barbara Stadlober<sup>a</sup> and Jan Hesse<sup>a,\*</sup>

*a.* JOANNEUM RESEARCH Forschungsgesellschaft mbH, Materials - Institute for Surface Technologies and Photonics, A-8160 Weiz, Austria. (Web: [www.joanneum.at/en/materials.html](http://www.joanneum.at/en/materials.html))

*b.* JOANNEUM RESEARCH Forschungsgesellschaft mbH, Health - Institute for Biomedicine and Health Sciences, 8010 Graz, Austria. (Web: [www.joanneum.at/en/health.html](http://www.joanneum.at/en/health.html))

*c.* GEN SPEED Biotech GmbH, 4261 Rainbach, Austria. (Web: [www.genspeed-biotech.com](http://www.genspeed-biotech.com))

*d.* micro resist technology GmbH, 12555 Berlin, Germany. (Web: [www.microresist.de](http://www.microresist.de))

*e.* SCIENION AG, D-12489 Berlin, Germany. (Web: [www.sciension.com](http://www.sciension.com))

*f.* TECNALIA Research & Innovation, E-48160 Derio, Bizkaia, Spain. (Web: [www.tecnalia.com](http://www.tecnalia.com))

*g.* INMOLD A/S, Savsvinget 4B, DK-2970 Horsholm, Denmark. (Web: [www.inmoldbiosystems.com](http://www.inmoldbiosystems.com))

# Current address: ERBA Diagnostics Mannheim GmbH, 68219 Mannheim, Germany. (Web: [www.erbamannheim.com](http://www.erbamannheim.com))

\* Corresponding authors. E-mail to: [Jan.Hesse@joanneum.at](mailto:Jan.Hesse@joanneum.at), [Pelin.ToerenOezguen@joanneum.at](mailto:Pelin.ToerenOezguen@joanneum.at).

Supplementary movies available: [R2R DNA micro spotting, Capillary flow in the R2R UV-NIL produced biochips].

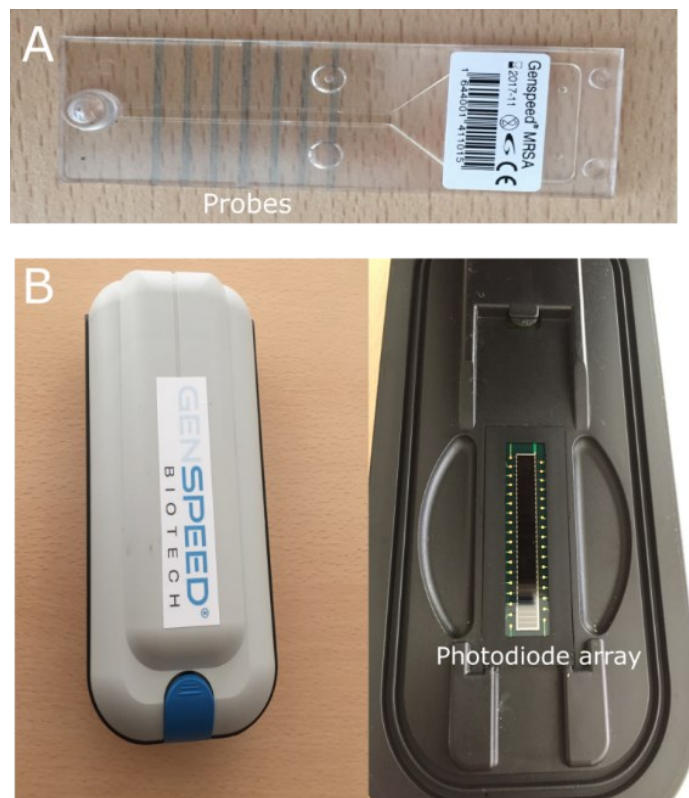

**Figure 1: GENSPEED® R<sub>1</sub> MRSA Sensing System (Genspeed-Biotech, Austria).** (A) A disposable, commercial GENSPEED® chip (25 mm width and 75 mm length) with the capillary printed different probe ss-DNAs (blue stripes) at the functionalised PS surface. (B) The first generation, GENSPEED® R<sub>1</sub> (left) with a photodiode array (right) inside the tray region wherein the disposable chip is inserted. The array consists of 32 photodiodes.

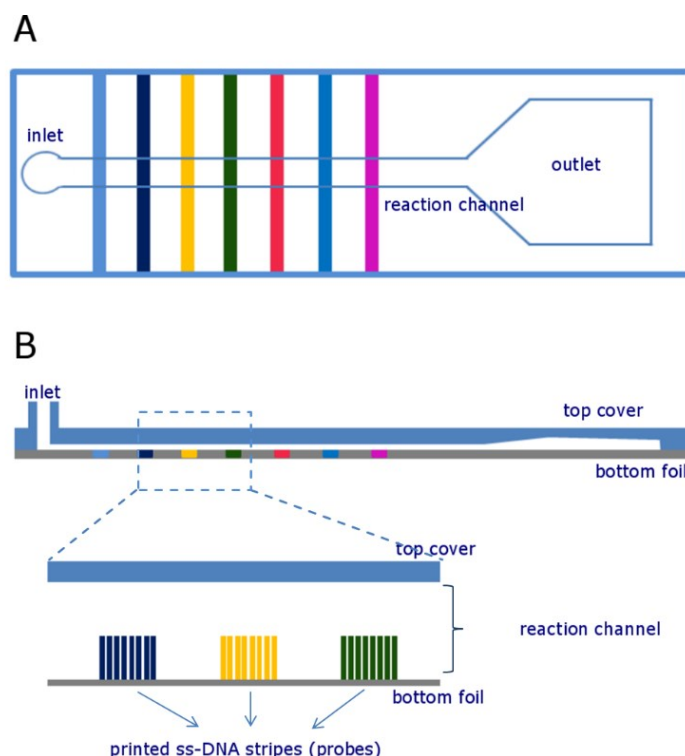

**Figure 2: The disposable GENSPPEED® bioanalytical chip for MRSA sensing (Genspeed-Biotech, Austria).<sup>1</sup>** Illustrations show (A) top and (B) side views of the commercial chip. The chip consists of an upper, injection-moulded top cover and a DNA functionalised polymeric foil as the bottom surface. The top cover has an inlet, a reaction channel and an outlet. The ss-DNA stripes (i.e., probes) are capillary printed at the bottom part of the foil using a printing solution without SciPOLY3D® linker. The biochip owns seven different probe regions enabling multiplexed testing. The probes were printed at the corresponding pixel locations of 4°, 8°, 12°, 16°, 20°, 24° and 28° in the photodiode array (from left to right SE, NC, mecA, mecC, SA, PC and HC probes). A closer look of the stripes are also shown in (B). Each stripe in different colour represents a different ss-DNA probe. Also, two parts are bound together using an ultrasonic welding machine.

**Table 1:** The layout of probe ss-DNA printing in the disposable biochips.

| Pixel (photodiode) position | Oligonucleotide abbreviation | Description                             |
|-----------------------------|------------------------------|-----------------------------------------|
| Pixel 4                     | SE                           | <i>S. epidermidis</i> probe             |
| Pixel 8                     | NC                           | Negative control                        |
| Pixel 12                    | mecA                         | Methicillin-resistant <i>mecA</i> probe |
| Pixel 16                    | mecC                         | Methicillin-resistant <i>mecC</i> probe |
| Pixel 20                    | SA                           | <i>S. aureus</i> probe                  |
| Pixel 24                    | PC                           | PCR control                             |
| Pixel 28                    | HC                           | Hybridisation control                   |

**Table 2:** Hybridisation protocol using 1X R2R solution.

| Solution                             | Volume (µl)                 | Time (min:sec) | Duration (min:sec)    |
|--------------------------------------|-----------------------------|----------------|-----------------------|
| Hybridisation (1X R2R, GENSPPEED® C) | 20                          | 0:00 (start)   | 3:00                  |
| Enzyme (GENSPPEED® D)                | 30                          | 3:00           | 1:30                  |
| Wash (GENSPPEED® E)                  | 40, 30*                     | 4:30           | 1:30                  |
| Chemiluminescent (GENSPPEED® F)      | 30, 20*                     | 6:00           | 2:30                  |
|                                      | 120, 100*<br>(total volume) | 8:30 (end)     | 8:30 (total duration) |

\*The values for the foil-based chip (i.e., Chip<sub>3</sub>). The amounts of the solutions E and F were re-adapted for Chip<sub>3</sub> since the designed total chip volume was smaller different than of the injection-moulded Chip<sub>1</sub> and Chip<sub>2</sub>.

<sup>1</sup> The figure was redrawn from Master thesis of Kerstin Spindlberger: Further development of a molecular diagnostic system towards integrated sample amplification and increasing multiplexing capabilities, Linz Fachhochschule, 2016 (Linz, Austria), page 16.

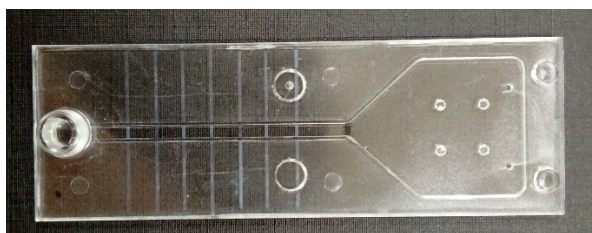

**Figure 3: The biochip with the injection-moulded top cover (i.e., Chip<sub>1</sub>).** The PS foil was capillary printed with 7 different ss-DNA stripes. The blue stripes from left to right are the probes of SE, NC, mecA, mecc, SA, PC and HC, respectively. **(B)** A finalised biochip, composed of the injection moulded top cover and the PS bottom part. Probe ss-DNAs (blue stripes) were capillary printed using the SciPOLY3D® DNA linker (Scienion AG, Germany). Also, the two parts were bound together inside the ultrasonic welding machine. The biochip dimensions are 75 mm (length), 25 mm (width), 1.5 mm (height).

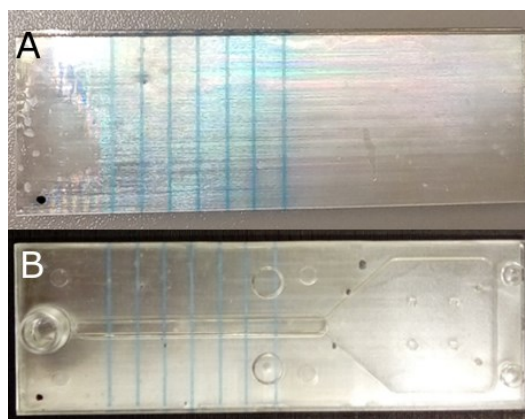

**Figure 4: The biochip with R2R UV-NIL produced optical microstructures (i.e., Chip<sub>2</sub>).** **(A)** The PS foils with imprinted optical microstructures (at the bottom side) and the capillary printed 7 different ss-DNA stripes (at the upper side). The finalised biochip composed of the injection moulded top cover and the R2R UV-NIL structured foil. Probe ss-DNAs (blue stripes) were capillary printed using SciPOLY3D® DNA linker. Also, the two parts were bound together using an ultrasonic welding machine. The biochip dimensions are 75 mm (length), 25 mm (width), 1.5 mm (height).

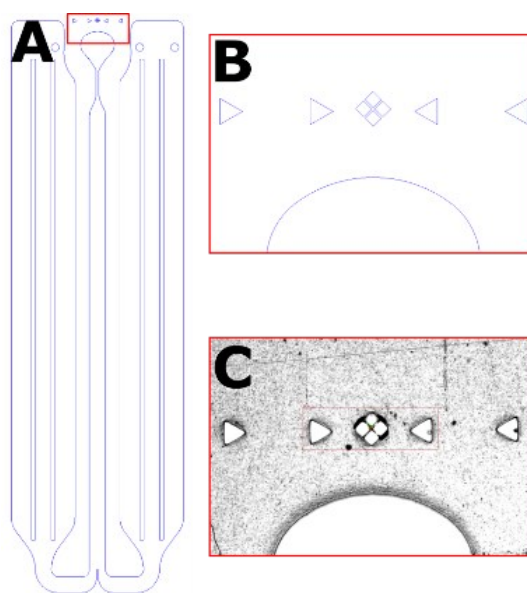

**Figure 5:** A drawing showing where the fiducial was located. **(A)** The complete channel design. The region, in which the fiducial was located, was indicated by the red lined rectangle. **(B)** The drawing showing the fiducial inside the red rectangle. **(C)** A vertical camera image from the micro-array spotter (sciFLEXARRAYER S12™, Scienion AG, Germany) showing the fiducial.

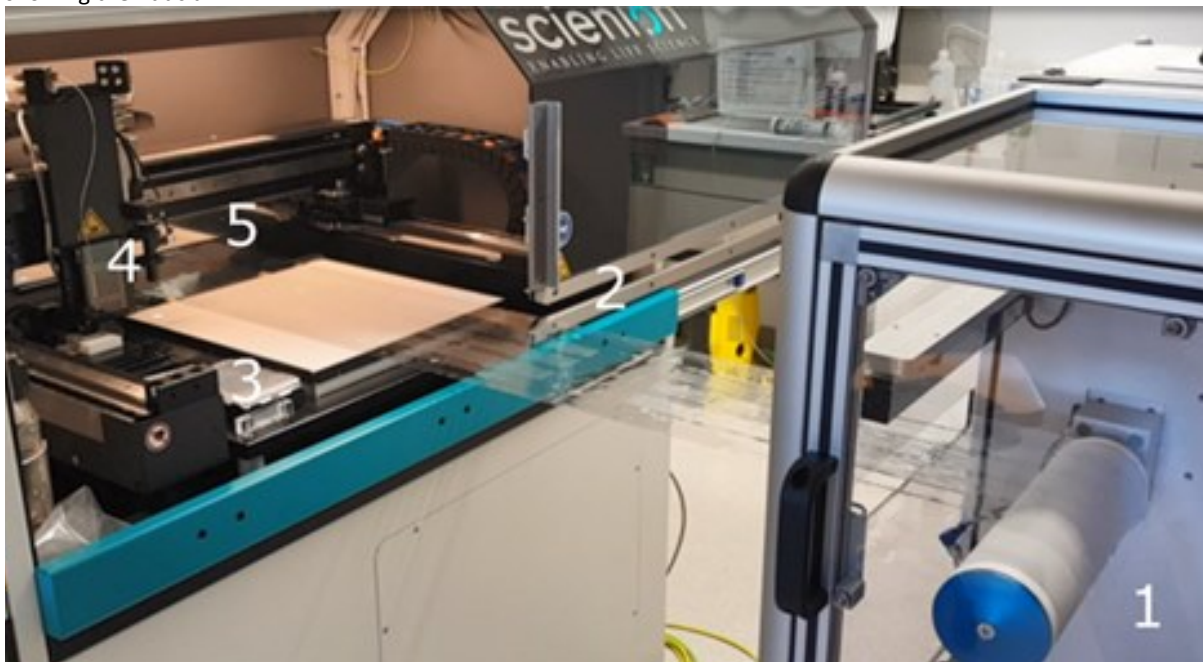

**Figure 6:** The automatic R2R micro-array spotting pilot line for biofunctionalisation. **(A)** The R2R UV-NIL structured polymer foil is wrapped over the web inside the unwinder (1). The front side of the medium-scale micro-array spotter (i.e., sciFLEXARRAYER S12™, Scienion AG, Germany) has a slit at its sliding door, which enables the foil movement (2). The ss-DNA probes are taken from a V-bottomed 96-well source plate (3), which is controlled by a chiller to keep the temperature constant. Then, micro-spotting is done using the PDC glass nozzles installed to the nozzle head (4). During the micro-spotting, the foil area of interest is stabilized by automatically activating the vacuum table (width: 300 mm, length: 375 mm) underneath, to avoid any undesired foil movements during the process.

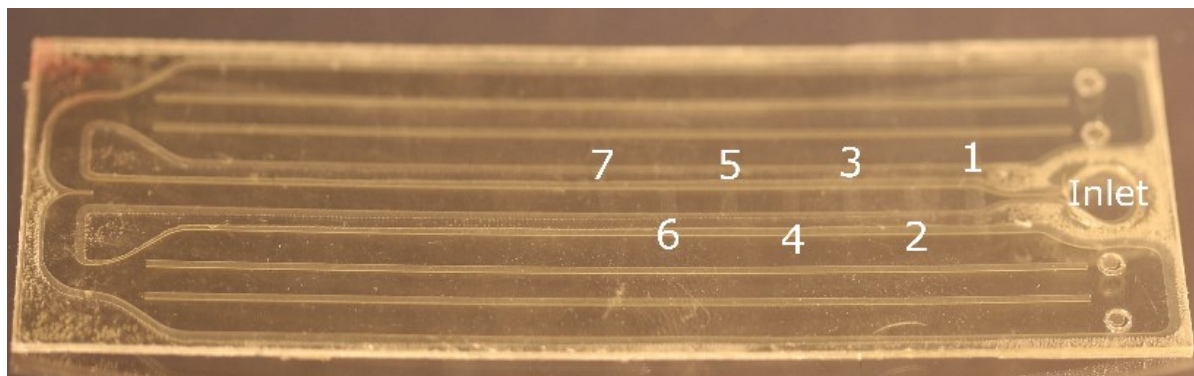

**Figure 7: The R2R UV-NIL imprinted biochip with 7 different probe ss-DNA micro-spots (i.e., Chip<sub>3</sub>), allowing a multiplexed analysis.** The micro-spots from 1 to 7 are the ss-DNA probes of SE, NC, mecA, mecc, SA, PC and HC, respectively. The micro-spotting was performed in the sciFLEXARRAYER S12™ (Sciencion AG, Germany), at room temperature and  $38 \pm 2$  % relative humidity. SciPOLY3D™ DNA linker (Sciencion AG, Germany) was utilized during the DNA micro-spotting. The two chip parts were bound together via the glue print, in a rolling mill machine (at 50 °C). The biochip dimensions are 75 mm (length), 25 mm (width), 100 μm (height).

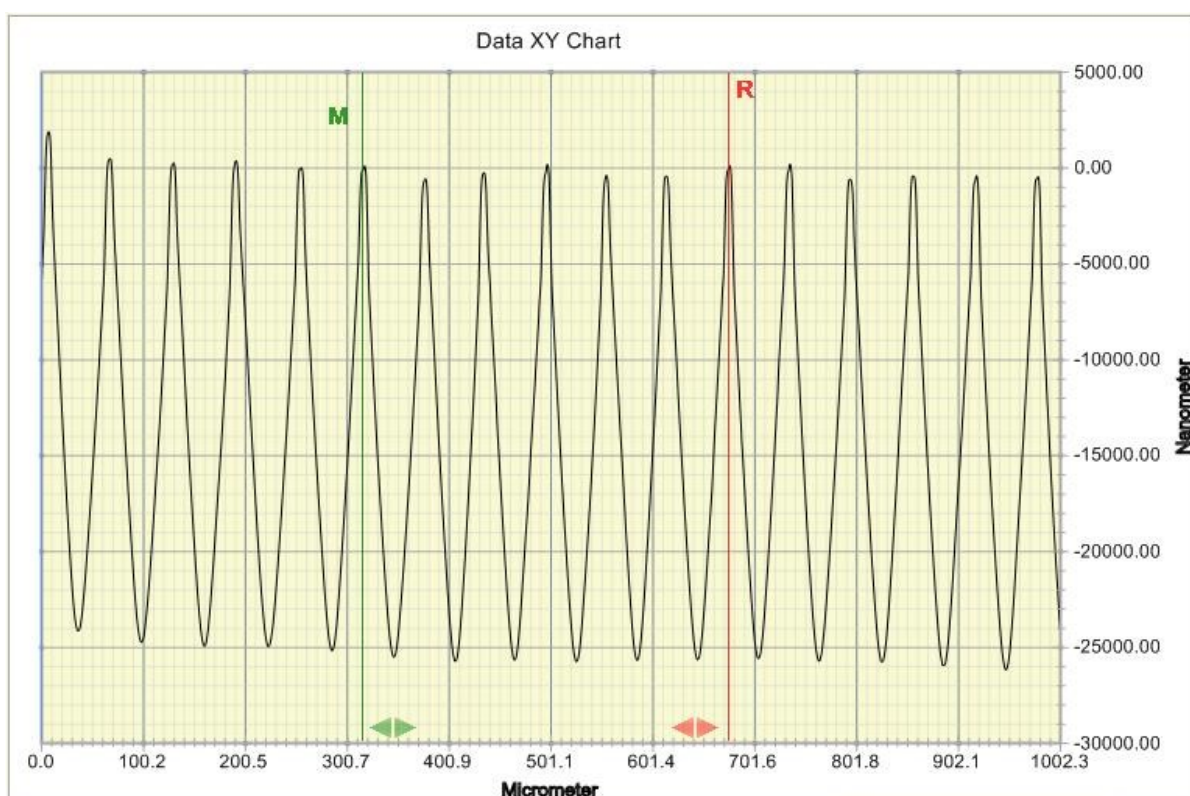

**Figure 8: The profilometry data of the R2R UV-NIL imprinted optical microstructures on PS foil.** The size and depth of the imprinted structures were analysed using the profilometre (Dektak 150 Surface Profiler, Veeco, USA). The structure height and side length were measured as  $\sim 25$  μm and  $\sim 50$  μm, respectively.

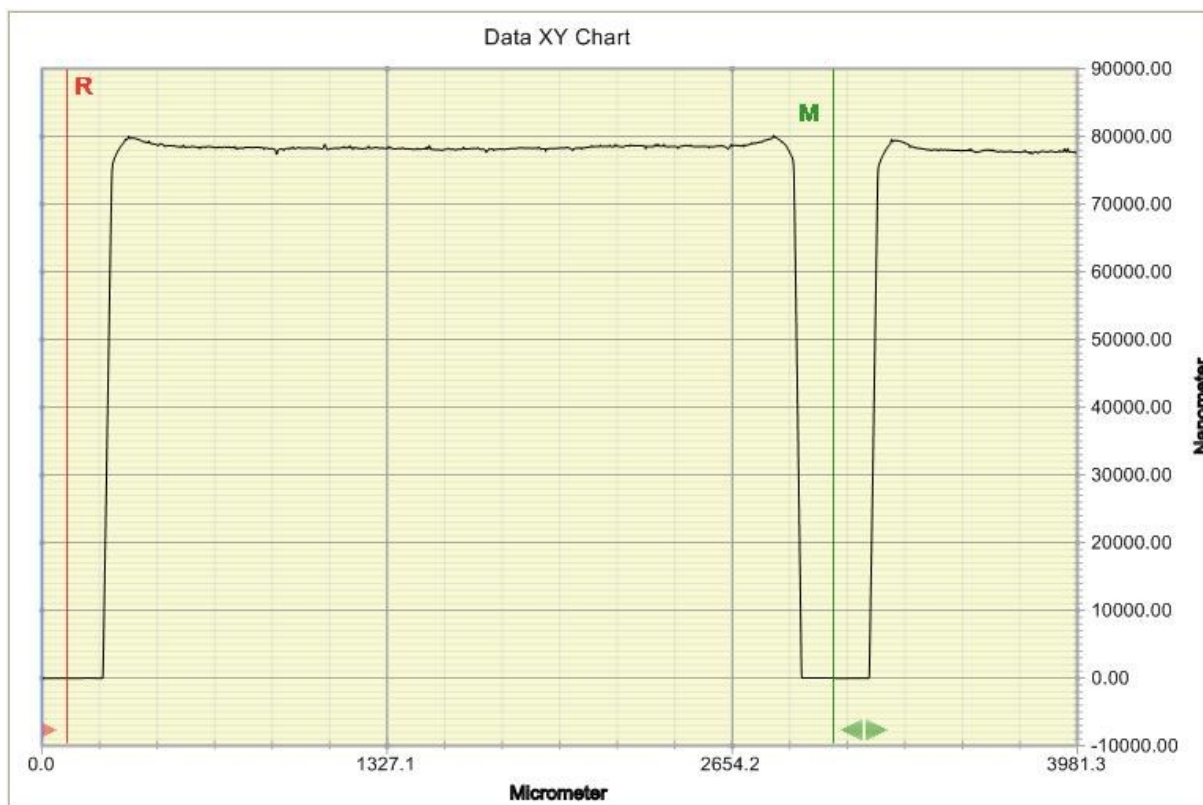

**Figure 9: The profilometry data of the R2R UV-NIL imprinted fluidic channel on PET foil.** The fluidic channel was analysed using the profilometre (Dektak 150 Surface Profiler, Veeco, USA). The channel depth and width were measured as 70  $\mu\text{m}$  and  $\sim 2700 \mu\text{m}$ , respectively.

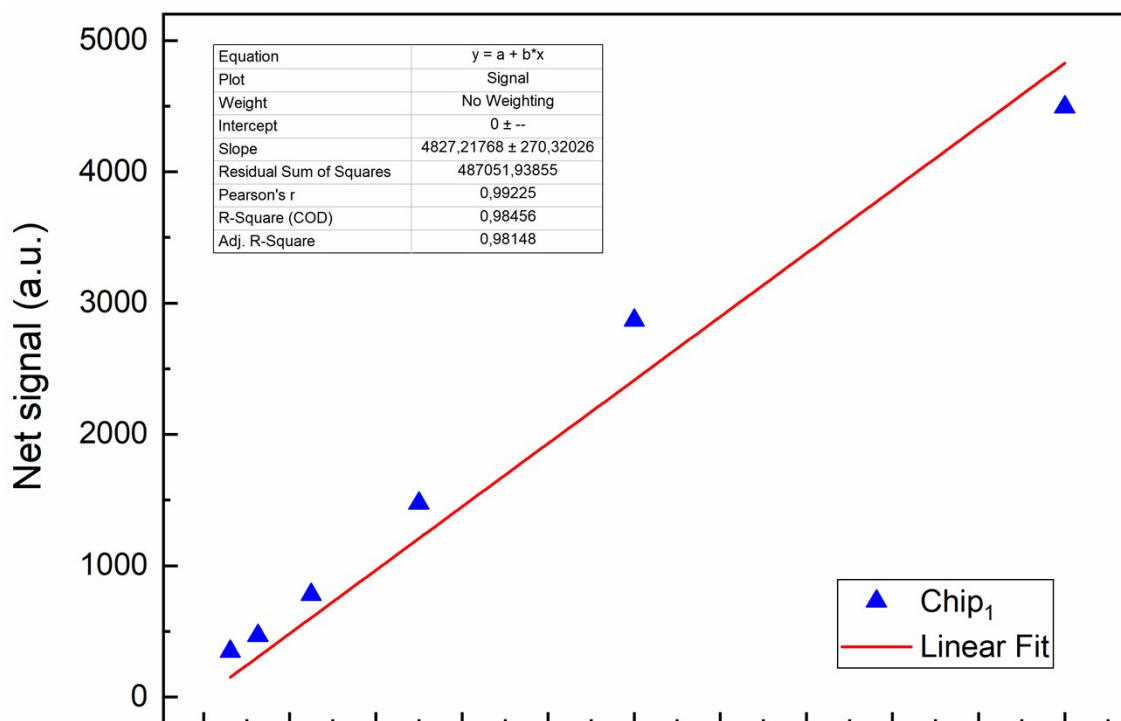

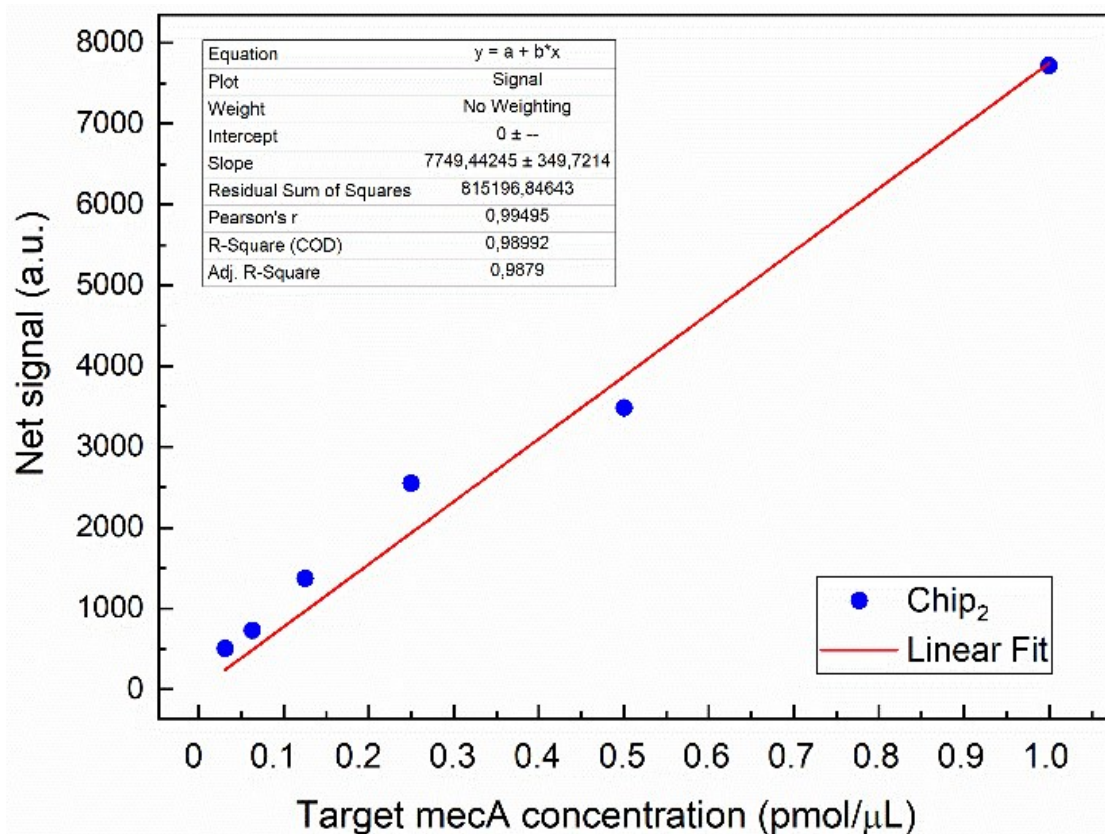

**Figure 10: The calibration curves for limit-of-detection (LOD) calculations.** The target mecA concentrations of 0.03, 0.06, 0.13, 0.25, 0.50 and 1.00 pmol/ $\mu$ L correspond to 1:32, 1:16, 1:8, 1:4, 1:2 and 1:1 dilution ratios of 1X R2R solution, respectively. 1X R2R solution contains 1  $\mu$ M of mecA target oligos. Each measurement was repeated 3 times at room temperature. Each data was provided as a mean value. The background values (a.u.) were subtracted from each data to provide a background corrected and integrated net signal (a.u.). For Chip<sub>1</sub> (**A**) and Chip<sub>2</sub> (**B**) LOD values for mecA detection, were calculated as 0.07 and 0.06  $\mu$ M, respectively. For an accurate calibration, the blank data were not included in the calibration curves for both results. Both blank intensity signals (a.u.) were below the hypothetical limit-of-blank signals (a.u.).
